# Supplementary material
Source: Springer Nature journal article supplement (https://www.springermedizin.de/resource/supplementary/12885_2011_2838_MOESM6_ESM.pdf/9462126)

A

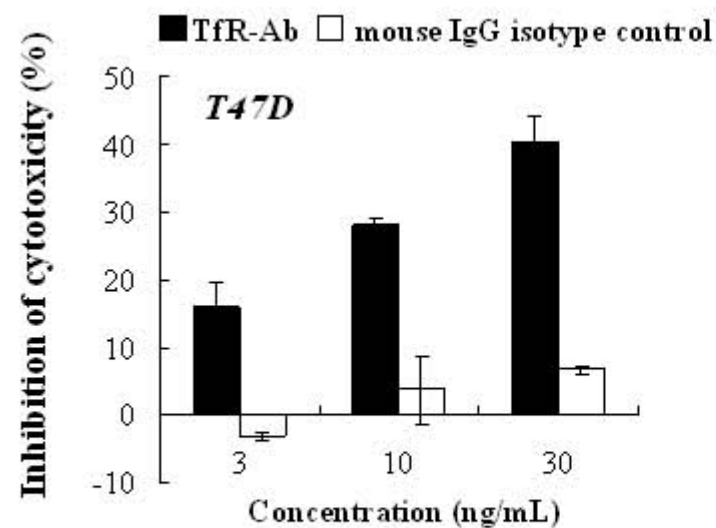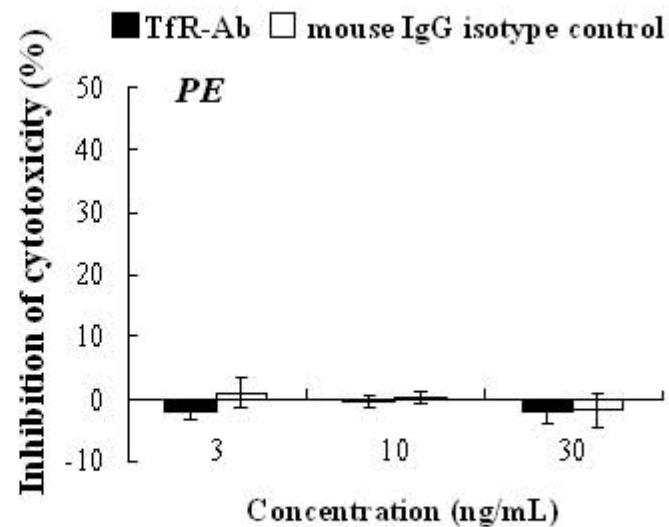

B

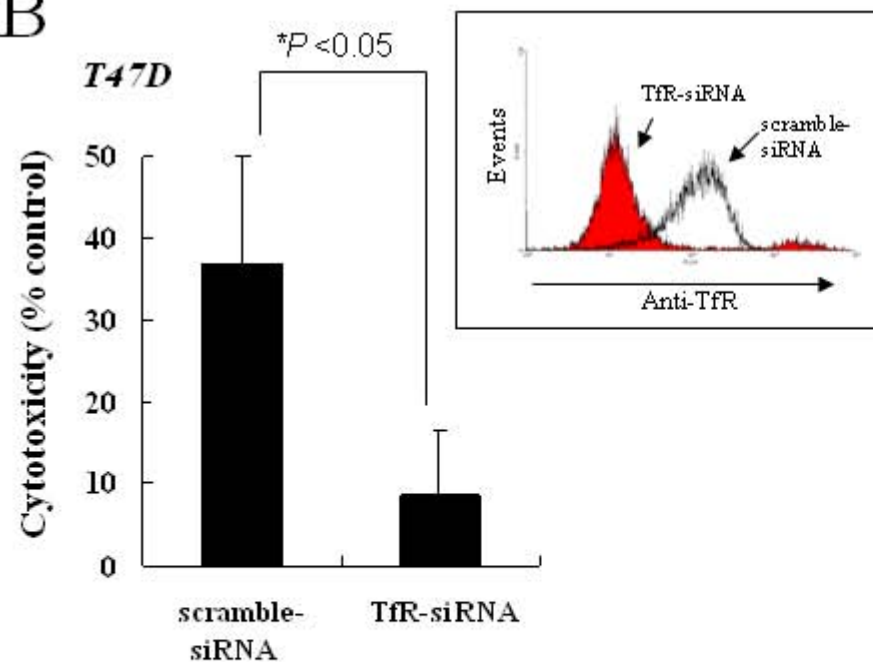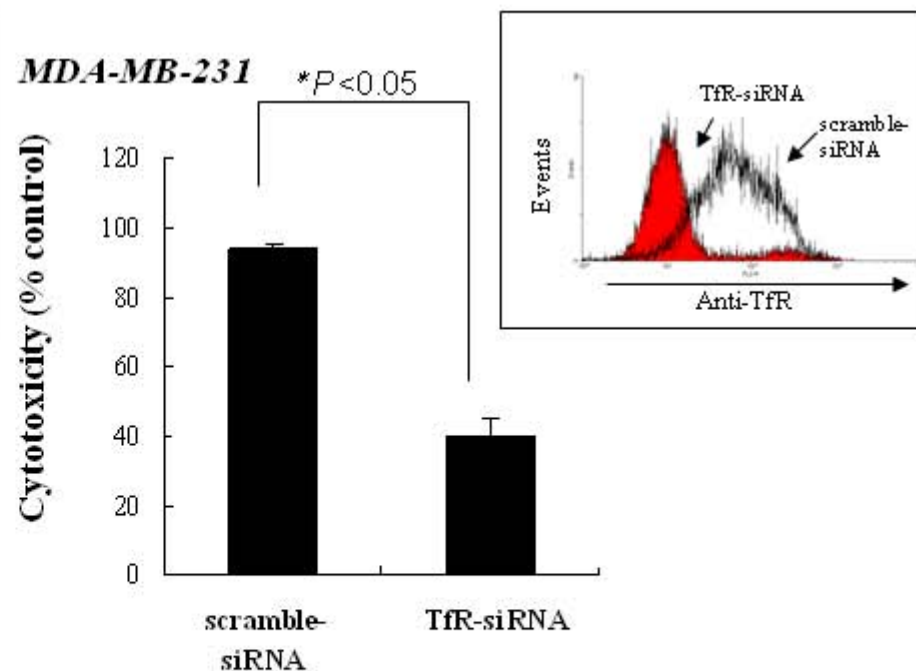

Supplement: MOESM6 [file 9462126]
